# Supplementary material
Source: ML conference proceedings conference paper supplement (https://proceedings.neurips.cc/paper_files/paper/2024/hash/cbc50abfb446dce0caae140b89d6ca12-Abstract.html)
Supplement: Supplementary file 1 [file cbc50abfb446dce0caae140b89d6ca12-Supplemental-Datasets_and_Benchmarks_Track.pdf]

---

# DECO-Bench: Unified Benchmark for Decoupled Task-Agnostic Synthetic Data Release : Supplementary

---

Anonymous Author(s)  
Affiliation

## 1 A Appendix / supplemental material

2 In this section, we present our supplementary materials that expand on details of our experiments  
3 and further discuss our results. In Sec. A.1 we describe our  $Tr + V + G$  setup and present the  
4 results. Sec. A.2 focuses on our experiments using only front faces of each dataset. In Sec. A.3, we  
5 elaborate on our setups and hyperparameters in details. And finally, Fig. 4 presents the high-resolution  
6 equivalent of Fig. 3 from the main paper.

### 7 A.1 Tr+V+G Experiments

8 In the main section of the paper, we observed the beneficial effect of adding  $V$  split while training the  
9 privacy and utility classifiers (i.e.,  $V + G$  vs  $G$ ). As we discussed in the main paper, the increased  
10 amount of data during classifiers training helps alleviate overfitting and allows for a better observation  
11 of the privacy-utility trade-off. To further investigate this, we generated synthetic images from the  $Tr$   
12 split and trained the classifiers. Tab. 7 to Tab. 10 extend the results from Tab. 2 to Tab. 5 (main paper)  
13 respectively. We observe that only some setups demonstrate improvement. We suggest this may be  
14 due to the fact that, despite the significant increase in data, we used the same backbone as before,  
15 ResNet18, which might not have sufficient capacity to benefit from the additional  $Tr$  set. It is also  
16 important to note, that since the base model is trained on  $Tr$ , we do not evaluate the privacy using PT  
17 for this setup.

Table 7: **Setup A:** Trained Fairface and Tested on Fairface dataset. Classification accuracy percentage for privacy leakage and utility.

|        | Method          | Privacy<br>(PT, Race, ↓) | Privacy<br>(CLS,Race,↓) | Util<br>(CLS,Age,↑) | Util<br>(CLS,Gender, ↑) |
|--------|-----------------|--------------------------|-------------------------|---------------------|-------------------------|
| Tr+V+G | Baseline (Real) | —                        | 62.38                   | 44.8                | 83.36                   |
|        | CE              | —                        | 51.03                   | 32.72               | 80.25                   |
|        | CE + Mask       | —                        | 48.87                   | 38.09               | 79.81                   |
|        | Metric Learning | —                        | 54.89                   | 29.56               | 76.47                   |

Table 8: **Setup B:** Trained FairFace and Tested on UTKFace dataset. Classification accuracy percentage for privacy leakage and utility.

|        | Method          | Privacy<br>(PT, Race, ↓) | Privacy<br>(CLS,Race,↓) | Util<br>(CLS,Age,↑) | Util<br>(CLS,Gender, ↑) |
|--------|-----------------|--------------------------|-------------------------|---------------------|-------------------------|
| Tr+V+G | Baseline (Real) | —                        | 81.24                   | 56.02               | 90.55                   |
|        | CE              | —                        | 69.71                   | 46.65               | 85.97                   |
|        | CE + Mask       | —                        | 61.22                   | 44.35               | 87.2                    |
|        | Metric Learning | —                        | 61.33                   | 39.31               | 84.79                   |

Table 9: **Setup C**: Trained (Fairface + UTKFace) and Tested on FairFace dataset. Classification accuracy percentage for privacy leakage and utility.

|        | Method          | Privacy<br>(PT, Race, ↓) | Privacy<br>(CLS,Race,↓) | Util<br>(CLS,Age,↑) | Util<br>(CLS,Gender, ↑) |
|--------|-----------------|--------------------------|-------------------------|---------------------|-------------------------|
| Tr+V+G | Baseline (Real) | —                        | 65.74                   | 44.53               | 84.63                   |
|        | CE              | —                        | 46.91                   | 39.42               | 81.45                   |
|        | CE + Mask       | —                        | 56.35                   | 38.46               | 79.89                   |
|        | Metric Learning | —                        | 57.92                   | 41.27               | 80.9                    |

Table 10: **Setup C**: Trained (Fairface + UTKFace) and Tested on UTKFace dataset. Classification accuracy percentage for privacy leakage and utility.

|        | Method          | Privacy<br>(PT, Race, ↓) | Privacy<br>(CLS,Race,↓) | Util<br>(CLS,Age,↑) | Util<br>(CLS,Gender, ↑) |
|--------|-----------------|--------------------------|-------------------------|---------------------|-------------------------|
| Tr+V+G | Baseline (Real) | —                        | 81.81                   | 54.84               | 91                      |
|        | CE              | —                        | 62.01                   | 40.75               | 88.19                   |
|        | CE + Mask       | —                        | 57.73                   | 42.35               | 88.92                   |
|        | Metric Learning | —                        | 66.28                   | 49.49               | 87.46                   |

## 18 A.2 Front Face Experiments

19 In many studies utilizing datasets of face images, it is common practice to use only front faces. In  
 20 our main paper, we presented results using both front and profile faces. To accommodate a variety  
 21 of experimental setups in our benchmark and to study the effect of using only front faces on the  
 22 privacy-utility trade-off, we repeat our experiments in this section using only front faces.

### 23 A.2.1 Front Face Detection:

24 To detect images with front faces, we processed all splits of the FairFace and UTKFace datasets  
 25 using dlib library [King, 2009]. We perform front face detection both in original image size and also  
 26 in  $128 \times 128$  resolution; given this is the image resolution we train our base model with. Below,  
 27 we present the statistics of front faces in each data split of the FairFace and UTKFace datasets. As  
 28 observed, the FairFace dataset contains more profile images compared to the UTKFace dataset.

Table 11: Dataset Statistics for Front Faces of FairFace and UTKFace datasets. The number of classes for the datasets after cross label mapping are demonstrated (see Sec.4.1, main paper).

| Dataset  | Train (Tr)<br>Samples | Val (V)<br>Samples | Gen (G)<br>Samples | Test<br>Samples | Privacy<br>Attr. (#Classes) | Utility<br>Attr. (#Classes) | Eval<br>Metric |
|----------|-----------------------|--------------------|--------------------|-----------------|-----------------------------|-----------------------------|----------------|
| FairFace | 11263                 | 1256               | 4480               | 2747            | Race (C=5)                  | Age (C=9), Gender (C=2)     | Accuracy       |
| UTKFace  | 12374                 | 1372               | 5307               | 3478            | Race (C=5)                  | Age (C=9), Gender (C=2)     | Accuracy       |

### 29 A.2.2 Front Face Evaluation:

30 In our first round of experiments, we maintain the entire pipeline from the main paper, with the  
 31 exception of using only front faces in the *Test* split. Specifically, we train the base model on *Tr*  
 32 using both front and profile images. We then generate synthetic images from  $G_{real}$ , and  $V, Tr$  splits  
 33 using both profile and front images and train the privacy and utility classifiers on them. In the final  
 34 step, we use only front faces in *Test* split for evaluation and report the privacy leakage and utility  
 35 performance. Similarly, for PT evaluation, we use only front faces. The results are presented in  
 36 Tab. 12 to Tab. 15.

Table 12: **Setup A** : Trained Fairface and Tested on Fairface dataset Front Faces only. Classification accuracy percentage for privacy leakage and utility.

|        | Method          | Privacy<br>(PT, Race, ↓) | Privacy<br>(CLS,Race,↓) | Util<br>(CLS,Age,↑) | Util<br>(CLS,Gender, ↑) |
|--------|-----------------|--------------------------|-------------------------|---------------------|-------------------------|
| G      | Baseline (Real) | –                        | 35.68                   | 39.86               | 76.01                   |
|        | CE              | 18.71                    | 42.34                   | 35.86               | 78.59                   |
|        | CE + Mask       | 15.13                    | 47.11                   | 37.31               | 72.12                   |
|        | Metric Learning | –                        | 50.86                   | 32.65               | 73.79                   |
| V+G    | Baseline (Real) | –                        | 58.54                   | 41.9                | 78.05                   |
|        | CE              | 18.56                    | 49.91                   | 36.55               | 75.83                   |
|        | CE + Mask       | 15.34                    | 50.24                   | 37.6                | 80.42                   |
|        | Metric Learning | –                        | 53.91                   | 37.57               | 76.37                   |
| Tr+V+G | Baseline (Real) | –                        | 67.24                   | 49.33               | 87.08                   |
|        | CE              | –                        | 45.94                   | 40.84               | 82.34                   |
|        | CE + Mask       | –                        | 28.76                   | 36.59               | 82.64                   |
|        | Metric Learning | –                        | 53.66                   | 40.01               | 82.71                   |

Table 13: **Setup B** : Trained Fairface and Tested on UTKFace dataset Front Faces only. Classification accuracy percentage for privacy leakage and utility.

|        | Method          | Privacy<br>(PT, Race, ↓) | Privacy<br>(CLS,Race,↓) | Util<br>(CLS,Age,↑) | Util<br>(CLS,Gender, ↑) |
|--------|-----------------|--------------------------|-------------------------|---------------------|-------------------------|
| G      | Baseline (Real) | –                        | 73.23                   | 48.33               | 86.83                   |
|        | CE              | 42.87                    | 66.1                    | 42.9                | 81.94                   |
|        | CE + Mask       | 16.90                    | 52.04                   | 44.31               | 84.39                   |
|        | Metric Learning | –                        | 59.8                    | 39.07               | 83.58                   |
| V+G    | Baseline (Real) | –                        | 72.94                   | 50.72               | 85.48                   |
|        | CE              | 42.82                    | 69.58                   | 44.77               | 84.91                   |
|        | CE + Mask       | 16.74                    | 57.82                   | 39.59               | 84.68                   |
|        | Metric Learning | –                        | 61.18                   | 43.16               | 83.84                   |
| Tr+V+G | Baseline (Real) | –                        | 81.68                   | 56.41               | 91.14                   |
|        | CE              | –                        | 69.47                   | 46.75               | 86.06                   |
|        | CE + Mask       | –                        | 61.33                   | 44.51               | 87.9                    |
|        | Metric Learning | –                        | 62.13                   | 39.25               | 84.85                   |

Table 14: **Setup C**: Trained Fairface+UTKFace Tested on FairFace dataset Front Faces only. Classification accuracy percentage for privacy leakage and utility.

|        | Method          | Privacy<br>(PT, Race, ↓) | Privacy<br>(CLS,Race,↓) | Util<br>(CLS,Age,↑) | Util<br>(CLS,Gender, ↑) |
|--------|-----------------|--------------------------|-------------------------|---------------------|-------------------------|
| G      | Baseline (Real) | –                        | 56.28                   | 43.54               | 81.43                   |
|        | CE              | 26.25                    | 48.02                   | 36.33               | 79.87                   |
|        | CE + Mask       | 15.13                    | 46.81                   | 35.57               | 76.3                    |
|        | Metric Learning | –                        | 45.61                   | 28.69               | 73.97                   |
| V+G    | Baseline (Real) | –                        | 59.23                   | 47.36               | 83.15                   |
|        | CE              | 26.87                    | 50.16                   | 37.02               | 80.31                   |
|        | CE + Mask       | 15.34                    | 42.81                   | 38.26               | 79.32                   |
|        | Metric Learning | –                        | 56.13                   | 33.71               | 78.01                   |
| Tr+V+G | Baseline (Real) | –                        | 71.06                   | 50.38               | 87.19                   |
|        | CE              | –                        | 57.41                   | 42.88               | 82.71                   |
|        | CE + Mask       | –                        | 55.08                   | 41.35               | 80.82                   |
|        | Metric Learning | –                        | 59.56                   | 43.17               | 83.4                    |

Table 15: **Setup C**: Trained Fairface+UTKFace Tested on UTKFace dataset Front Faces only. Classification accuracy percentage for privacy leakage and utility.

|        | Method          | Privacy<br>(PT, Race, ↓) | Privacy<br>(CLS,Race,↓) | Util<br>(CLS,Age,↑) | Util<br>(CLS,Gender, ↑) |
|--------|-----------------|--------------------------|-------------------------|---------------------|-------------------------|
| G      | Baseline (Real) | –                        | 76.57                   | 50.86               | 88.18                   |
|        | CE              | 13.64                    | 59.49                   | 43.42               | 85.51                   |
|        | CE + Mask       | 16.90                    | 58.77                   | 42.32               | 87.21                   |
|        | Metric Learning | –                        | 51.04                   | 41.17               | 82.78                   |
| V+G    | Baseline (Real) | –                        | 76.88                   | 52.67               | 88.04                   |
|        | CE              | 13.82                    | 62.1                    | 42.21               | 86.83                   |
|        | CE + Mask       | 16.74                    | 64.17                   | 43.67               | 87.98                   |
|        | Metric Learning | –                        | 55.15                   | 42.73               | 84.88                   |
| Tr+V+G | Baseline (Real) | –                        | 80.71                   | 55.78               | 90.8                    |
|        | CE              | –                        | 62.39                   | 41.09               | 88.13                   |
|        | CE + Mask       | –                        | 58.05                   | 42.73               | 89.13                   |
|        | Metric Learning | –                        | 66.53                   | 49.74               | 87.61                   |

### 37 A.2.3 Front Face Training and Evaluation

38 In this section, we extend our front face experiments by repeating the entire pipeline using only front  
39 faces. Specifically, we train the base model using only front faces of  $Tr$  set, followed by generating  
40 synthetic images from only front faces of  $G_{real}$ ,  $V$  and  $Tr$  splits. We then train the privacy and utility  
41 classifiers using these generated images and, finally, evaluate the models on only the front faces of  
42  $Test$  split. Tab. 16 to Tab. 19 demonstrate the results.

Table 16: **Setup A (Front Faces only)**: Trained Fairface Front Faces only and Tested on Fairface dataset Front Faces only. Classification accuracy percentage for privacy leakage and utility.

|        | Method          | Privacy<br>(PT, Race, ↓) | Privacy<br>(CLS,Race,↓) | Util<br>(CLS,Age,↑) | Util<br>(CLS,Gender, ↑) |
|--------|-----------------|--------------------------|-------------------------|---------------------|-------------------------|
| G      | Baseline (Real) | –                        | 54.42                   | 34.55               | 71.17                   |
|        | CE              | 18.70                    | 42.52                   | 34.44               | 72.52                   |
|        | CE + Mask       | 15.13                    | 46.01                   | 35.02               | 72.26                   |
|        | Metric Learning | –                        | 51.18                   | 36.08               | 72.84                   |
| V+G    | Baseline (Real) | –                        | 56.75                   | 38.7                | 79.43                   |
|        | CE              | 18.54                    | 33.49                   | 35.24               | 72.04                   |
|        | CE + Mask       | 15.34                    | 40.88                   | 37.5                | 76.77                   |
|        | Metric Learning | –                        | 45.18                   | 36.4                | 76.88                   |
| Tr+V+G | Baseline (Real) | –                        | 67.53                   | 45.9                | 85.84                   |
|        | CE              | –                        | 56.57                   | 41.32               | 81.58                   |
|        | CE + Mask       | –                        | 45.69                   | 35.27               | 82.82                   |
|        | Metric Learning | –                        | 46.09                   | 40.52               | 80.85                   |

Table 17: **Setup B (Front Faces only)**: Trained Fairface Front Faces only and Tested on UTKFace dataset Front Faces only. Classification accuracy percentage for privacy leakage and utility.

|        | Method          | Privacy<br>(PT, Race, ↓) | Privacy<br>(CLS,Race,↓) | Util<br>(CLS,Age,↑) | Util<br>(CLS,Gender, ↑) |
|--------|-----------------|--------------------------|-------------------------|---------------------|-------------------------|
| G      | Baseline (Real) | –                        | 72.83                   | 48.88               | 83.32                   |
|        | CE              | 42.87                    | 63.02                   | 43.93               | 81.08                   |
|        | CE + Mask       | 16.90                    | 52.59                   | 38.47               | 86.26                   |
|        | Metric Learning | –                        | 60.7                    | 34.76               | 83.29                   |
| V+G    | Baseline (Real) | –                        | 74.24                   | 48.91               | 87.72                   |
|        | CE              | 42.82                    | 66.07                   | 41.35               | 83.84                   |
|        | CE + Mask       | 16.74                    | 61.96                   | 44.13               | 85.48                   |
|        | Metric Learning | –                        | 62.33                   | 42.73               | 83.73                   |
| Tr+V+G | Baseline (Real) | –                        | 79.61                   | 54.17               | 88.9                    |
|        | CE              | –                        | 61.87                   | 46.18               | 84.73                   |
|        | CE + Mask       | –                        | 65.96                   | 47.18               | 87.26                   |
|        | Metric Learning | –                        | 63.89                   | 44.48               | 89.1                    |

Table 18: **Setup C (Front Faces only)**: Trained Fairface + UTKFace Front Faces only and Tested on Fairface dataset Front Faces only. Classification accuracy percentage for privacy leakage and utility.

|        | Method          | Privacy<br>(PT, Race, ↓) | Privacy<br>(CLS,Race,↓) | Util<br>(CLS,Age,↑) | Util<br>(CLS,Gender, ↑) |
|--------|-----------------|--------------------------|-------------------------|---------------------|-------------------------|
| G      | Baseline (Real) | –                        | 59.96                   | 42.77               | 78.96                   |
|        | CE              | 26.25                    | 45.58                   | 35.35               | 78.41                   |
|        | CE + Mask       | 15.13                    | 51.62                   | 38.11               | 77.18                   |
|        | Metric Learning | –                        | 42.34                   | 31.67               | 77.25                   |
| V+G    | Baseline (Real) | –                        | 59.05                   | 44.05               | 83.29                   |
|        | CE              | 26.87                    | 43.79                   | 39.79               | 77.9                    |
|        | CE + Mask       | 15.34                    | 44.99                   | 39.06               | 75.06                   |
|        | Metric Learning | –                        | 45.03                   | 37.68               | 76.45                   |
| Tr+V+G | Baseline (Real) | –                        | 67.09                   | 49.22               | 86.71                   |
|        | CE              | –                        | 50.16                   | 38.48               | 80.74                   |
|        | CE + Mask       | –                        | 51.58                   | 41.35               | 82.64                   |
|        | Metric Learning | –                        | 57.04                   | 43.17               | 81.87                   |

### 43 A.3 Experiment Details:

44 In this section, we provide detailed training information and hyperparameters for every component  
 45 in our pipeline, supplementing Sec.4.2 of the main paper. **Base model:** to train the base model, we  
 46 resize all images to  $128 \times 128$ . The LoRA adapter layers are initialized with Gaussian distribution,  
 47 and their rank is set to 4. The base model is trained for 15 epochs using a batch size of 128 and the  
 48 AdamW [Loshchilov and Hutter, 2019] optimizer with weight decay of 0.01. The learning rate is  
 49  $1e - 5$  for CE and CE+Mask, and  $1e - 4$  for Metric learning. We stop training before overfitting  
 50 occurs. We employ a constant learning rate scheduler with 200 warm-up steps and apply gradient  
 51 clipping with maximum grad norm of 1. The margin for triplet margin loss (metric learning) is 0.3.  
 52 The masking ratio for CE+Mask setup is 0.6 and the sigmoid temperature in FGN is 1/30. A LoRA  
 53 adapter is added to the learnable layer of FGN. The configurations for variational autoencoder and  
 54 CLIP remain unchanged after loading the pretrained models [hf].

55 **Generation:** During generation, we load our pretrained base model with trained LoRA adaptors into  
 56 the SD image-to-image pipeline [Meng et al., 2021]. The strength and guidance scale are set to 0.75  
 57 and 7.5, respectively. We fuse the LoRA weights with the scale of 1, meaning the LoRA weights  
 58 completely replace the weights of the base layer they were added to.

59 **Classification:** The classifiers are trained using an image resolution of  $128 \times 128$  and a batch size of  
 60 128. The ResNet18 weights are initialized randomly. We use an SGD optimizer with weight decay  
 61 of  $5e - 4$ , momentum of 0.9, and learning rate of 0.1. An exponential learning rate scheduler with

Table 19: **Setup C (Front Faces only)**: Trained Fairface + UTKFace Front Faces only and Tested on UTKFace dataset Front Faces only. Classification accuracy percentage for privacy leakage and utility.

|        | Method          | Privacy<br>(PT, Race, ↓) | Privacy<br>(CLS,Race,↓) | Util<br>(CLS,Age,↑) | Util<br>(CLS,Gender, ↑) |
|--------|-----------------|--------------------------|-------------------------|---------------------|-------------------------|
| G      | Baseline (Real) | —                        | 76.77                   | 52.19               | 86.69                   |
|        | CE              | 13.64                    | 63.77                   | 39.59               | 85.85                   |
|        | CE + Mask       | 16.90                    | 58.8                    | 44.88               | 85.34                   |
|        | Metric Learning | —                        | 58.05                   | 43.3                | 84.73                   |
| V+G    | Baseline (Real) | —                        | 73.75                   | 51.44               | 88.5                    |
|        | CE              | 13.82                    | 67.94                   | 44.45               | 85.83                   |
|        | CE + Mask       | 16.74                    | 53.54                   | 40.91               | 85.34                   |
|        | Metric Learning | —                        | 66.5                    | 44.42               | 84.96                   |
| Tr+V+G | Baseline (Real) | —                        | 82.58                   | 56.12               | 91.17                   |
|        | CE              | —                        | 64.09                   | 45.95               | 87.92                   |
|        | CE + Mask       | —                        | 64.26                   | 48.39               | 87.67                   |
|        | Metric Learning | —                        | 67.4                    | 44.22               | 88.59                   |

62 gamma of 0.9 is employed, and the models are trained for 100 epochs, stopping training after 20  
 63 epochs of no improvement (delta 0.01) in validation loss.

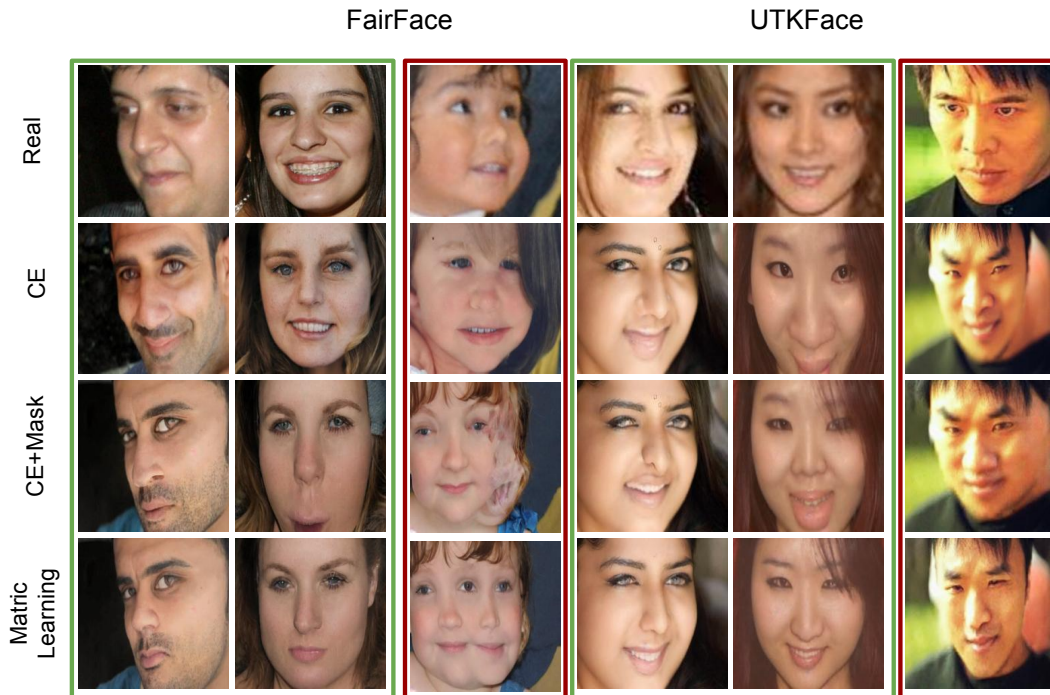

Figure 4: Generated Examples. High resolution image from main paper.

64 **References**

65 URL <https://huggingface.co/runwayml/stable-diffusion-v1-5>.

66 Davis E. King. Dlib-ml: A machine learning toolkit. *Journal of Machine Learning Research*, 10:  
67 1755–1758, 2009.

68 Ilya Loshchilov and Frank Hutter. Decoupled weight decay regularization, 2019.

69 Chenlin Meng, Yutong He, Yang Song, Jiaming Song, Jiajun Wu, Jun-Yan Zhu, and Stefano Ermon.  
70 Sdedit: Guided image synthesis and editing with stochastic differential equations. *arXiv preprint*  
71 *arXiv:2108.01073*, 2021.
